# Supplementary material
Source: Springer Nature journal article supplement (https://www.springermedizin.de/resource/supplementary/12891_2014_2232_MOESM2_ESM.pdf/9509736)

## wrist movements

*flexion* (70-80°)/*extension* (60-80°)    *radial* (15-25°)/*ulnar deviation* (30-40°)

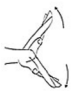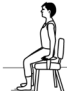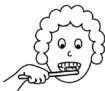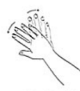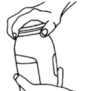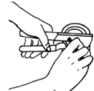

## movement description

### *flexion/extension*

bending the palm down /  
raising the back of the hand

### *radial/ulnar deviation*

bending the wrist to the thumb,  
or radial bone/  
bending the wrist to the little finger,  
or ulnar bone

## movement instruction – determination of key characteristics

### *flexion/extension*

up – centered / down – centered

### *radial/ulnar deviation*

inwards – centered – outwards – centered

## Mental Practice Group

*physical training* with healthy side  
alternating with *mental practice*  
with both sides using visual,  
cognitive, and kinesthetic cues

## Mirror Therapy Group

*physical training* with healthy side  
alternating with *mirror training*  
with healthy side using visual cues

## motor representation

## physical execution of wrist movements

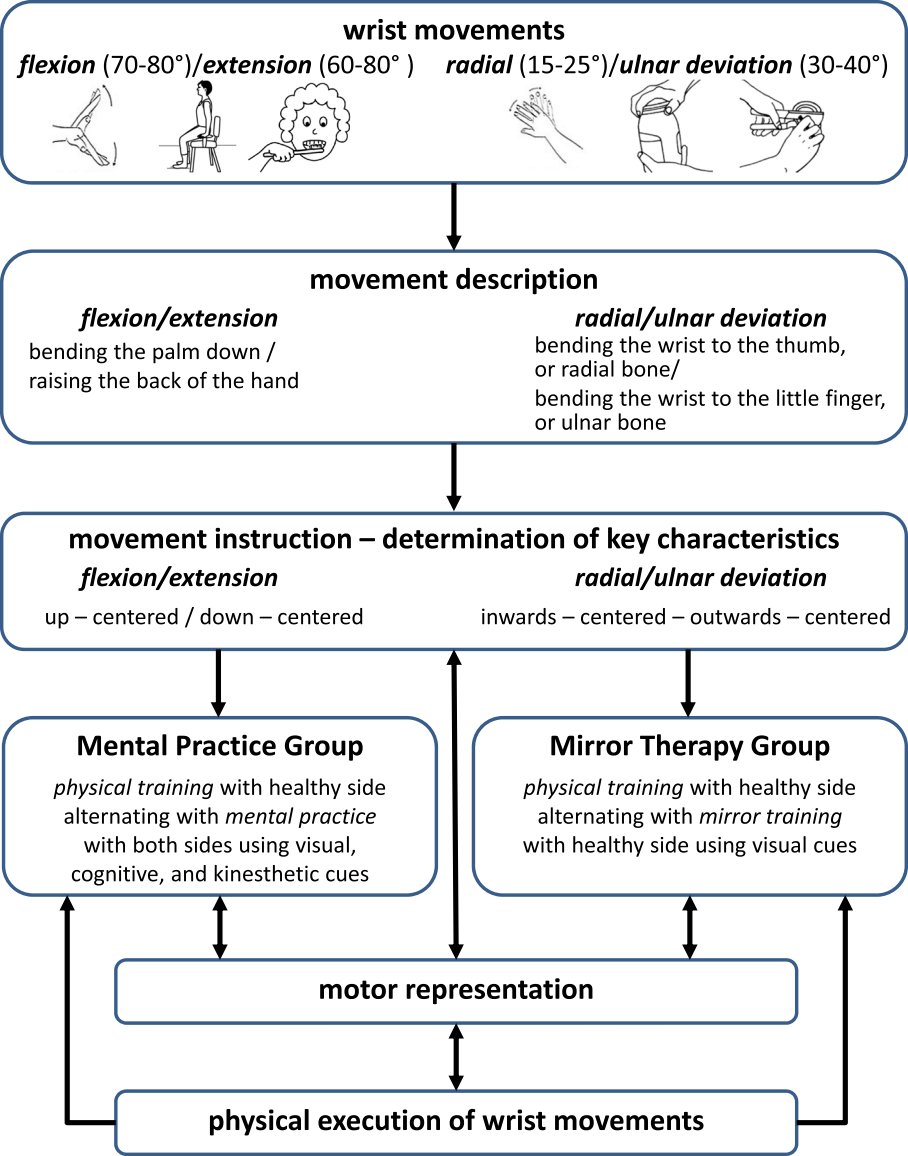

Supplement: MOESM2 [file 9509736]
